# Supplementary material
Source: PubMed Central journal article supplement (PMC6692911)
Supplement: NIHMS1043530-supplement-Figures.pdf [file NIHMS1043530-supplement-Figures.pdf]

# Supplementary materials for

## **goCTF: Geometrically optimized CTF determination for single-particle cryo-EM**

Min Su

*Life Sciences Institute, University of Michigan, Ann Arbor 48109, USA*

*E-mail address: [minsus@umich.edu](mailto:minsus@umich.edu)*

(734) 647-8193

### **Table of contents**

**Fig. S1.** Determined focus gradient comparison between gCTF vs. goCTF.

**Fig. S2.** Fourier shell correlation of reconstructions obtained from gCTF and goCTF.

**Fig. S3.** Histogram of tilt angle determined by CTFTilt and goCTF.

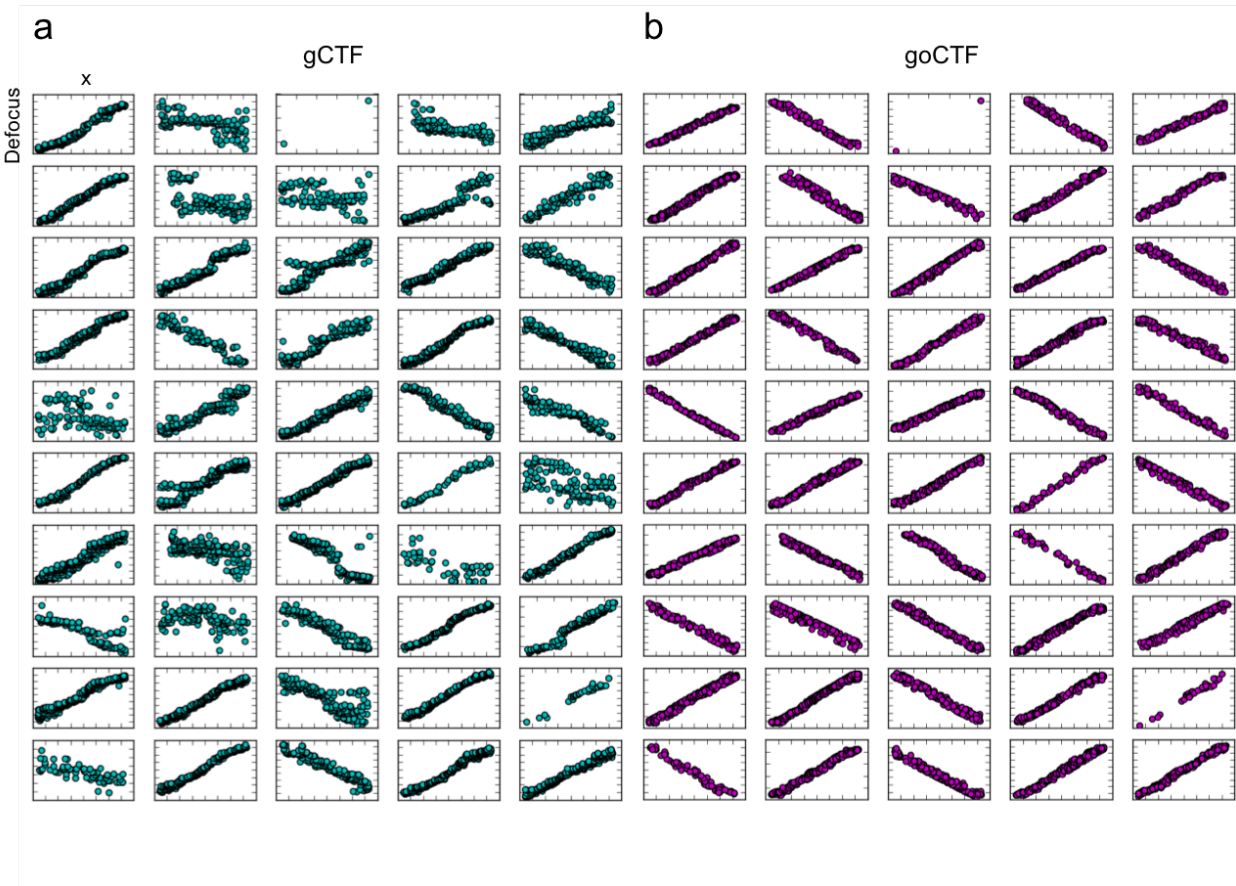

Fig. S1. Local focus refinement performance comparison between gCTF and goCTF using the benchmark dataset (EMPIAR-10097). (a) One snapshot of randomly selected 50 micrographs with local defocus determined by gCTF. (b) Same experiment as (a) except with local defocus determined by goCTF.

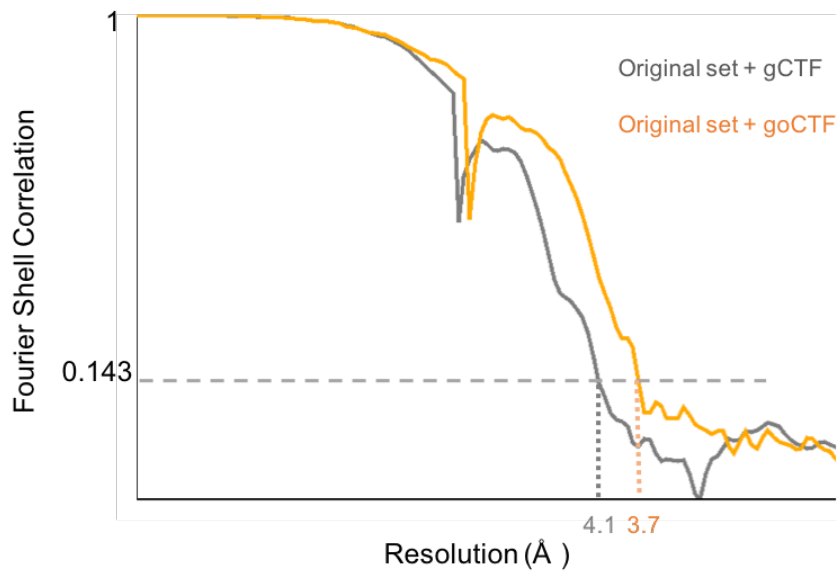

Fig. S2. Fourier shell correlation of reconstructions obtained from the benchmark dataset (EMPIAR-10097). Original set contains 130,000 particles with a local defocus determined by gCTF shown in grey indicates 4.1 Å resolution. The same set with local focus determined by goCTF shown in yellow indicates 3.7 Å resolution.

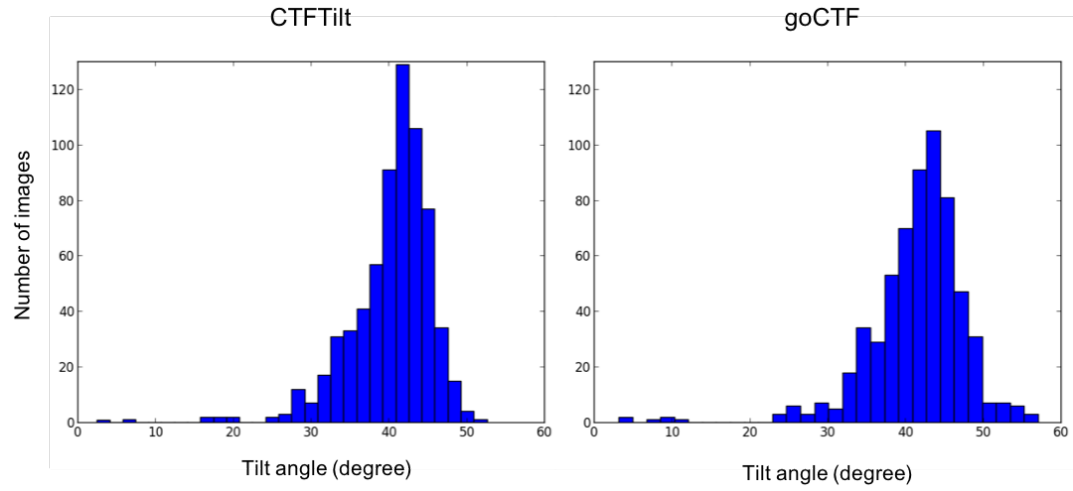

Fig. S3. Histogram of determined tilt angle from CTFTilt (left) and goCTF (right) using benchmark dataset (EMPIAR-10097).
